# Supplementary material
Source: publisher figshare collection journal article supplement (https://acs.figshare.com/ndownloader/files/4405615)
Supplement: Supplementary file 1 [file 4405615]

Supporting Information Available:

## Metallic and Ionic Fe Induced Growth of Si-SiO<sub>x</sub> Core-shell Nanowires

Tian-Xiao Nie,<sup>†,‡</sup> Zhi-Gang Chen,<sup>‡</sup> Yue-Qin Wu,<sup>†</sup> Jia-Le Wang,<sup>†</sup> Jiu-Zhan Zhang,<sup>†</sup>  
Yong-Liang Fan,<sup>†</sup> Xin-Ju Yang,<sup>†</sup> Zui-Min Jiang<sup>\*,†</sup> and Jin Zou<sup>\*,‡</sup>

*State Key Laboratory of Surface Physics, Fudan University, Shanghai 200433, China, and Materials Engineering and Centre for Microscopy and Microanalysis, The University of Queensland, QLD 4072, Australia*

\* To whom correspondence should be addressed. E-mail: [zmjiang@fudan.edu.cn](mailto:zmjiang@fudan.edu.cn) (Z.-M.J.), [j.zou@uq.edu.au](mailto:j.zou@uq.edu.au) (J. Z.).

<sup>†</sup> Fudan University.

<sup>‡</sup> The University of Queensland.

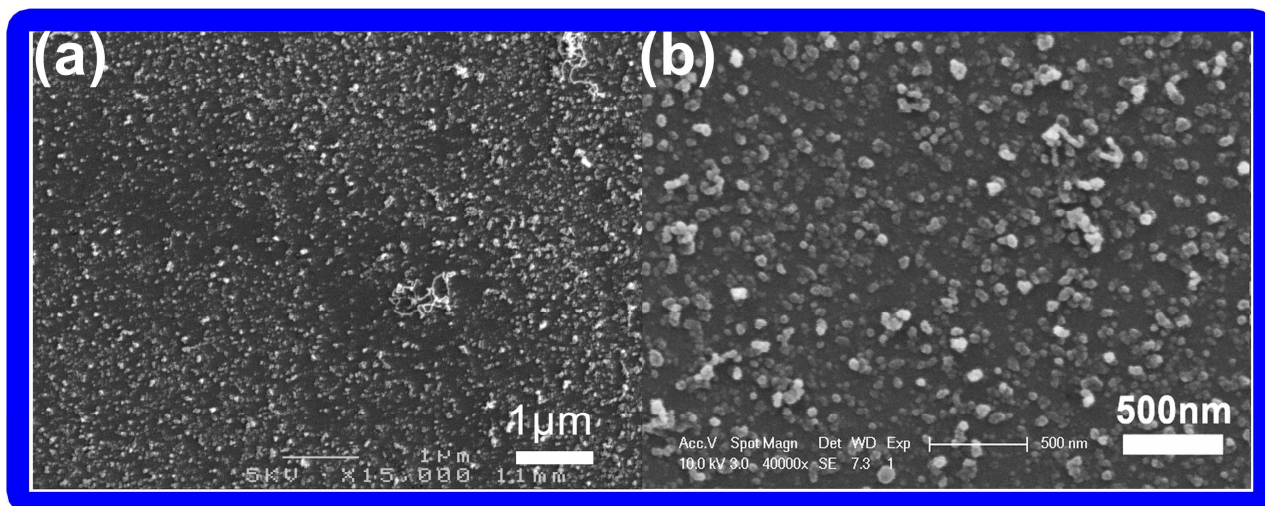

Figure S1a is a low magnification SEM image of the Si wafer covered with the Fe film annealing at 1000 °C, showing large quantities of nanosized particles formed on the wafer surface. Figure S1b is a close-up view of the SEM image and shows that the nanosized particles have a size distribution of 20-100 nm.
